# Supplementary material
Source: PubMed Central journal article supplement (PMC6826528)

Flow diagram showing results/outcome of patients.

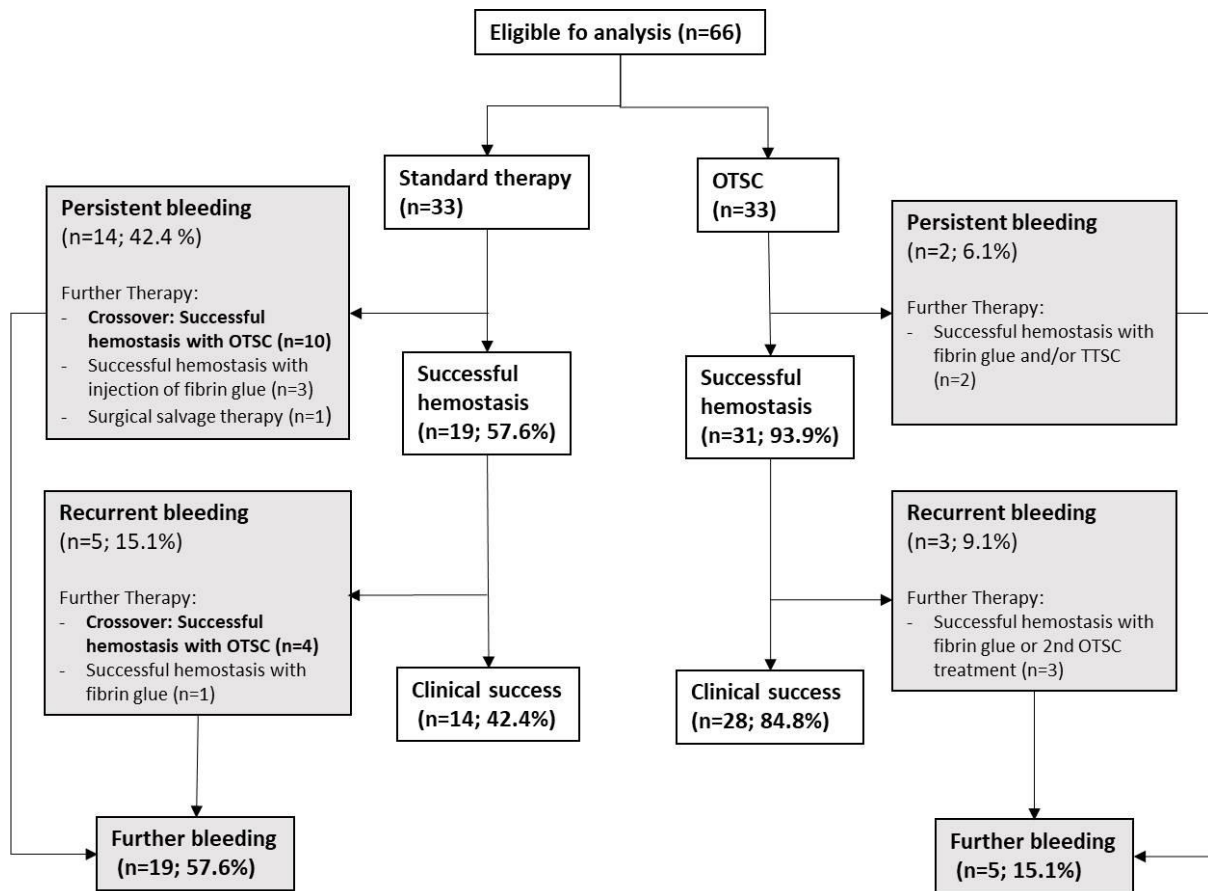

Supplement: UEG871754_Supplemental_Material.pdf [file UEG871754_Supplemental_Material.pdf]
